# Supplementary material for: Genomic and Metabolic Characterization of Plant Growth-Promoting Rhizobacteria Isolated from Nodules of Clovers Grown in Non-Farmed Soil
Source: MDPI journal article supplement (doi:10.3390/ijms242316679), 2023-11-23
Supplement: s1 [file s1]

Supplementary Data for

**Genomic and metabolic characterization of plant growth-promoting rhizobacteria isolated from nodules of clover grown in non-farmed soil**

Magdalena Wójcik, Piotr Koper, Kamil Żebracki, Małgorzata Marczak, Andrzej Mazur\*

Department of Genetics and Microbiology, Institute of Biological Sciences, Maria Curie-Skłodowska University, Akademicka 19 St., 20-033 Lublin, Poland

\*Correspondence: [andrzej.mazur@mail.umcs.pl](mailto:andrzej.mazur@mail.umcs.pl) (A.M.)

This PDF file includes:

Supplementary Tables S1 to S2  
Supplementary Figures S1 to S5

Supplementary Table S1. Sequencing data processing results.

| Clover rhizosphere microbiota | Sample name | Input sequences | Sequences after preprocessing | Sequences after chimera removal | Sequences assigned to OTUs | Sequences assigned to taxa |
|-------------------------------|-------------|-----------------|-------------------------------|---------------------------------|----------------------------|----------------------------|
| Non-farmed soil               | A1          | 142,741         | 142,728                       | 142,202                         | 67,660                     | 67,660                     |
|                               | A2          | 117,392         | 117,378                       | 117,294                         | 62,174                     | 62,174                     |
|                               | A3          | 133,225         | 133,216                       | 132,867                         | 55,417                     | 55,417                     |
| Agricultural soil             | B1          | 154,950         | 154,933                       | 154,578                         | 68,491                     | 68,491                     |
|                               | B2          | 126,259         | 126,253                       | 125,933                         | 53,292                     | 53,292                     |
|                               | B3          | 135,907         | 135,896                       | 135,600                         | 67,351                     | 67,351                     |
|                               | TOTAL       | 810,474         | 810,404                       | 808,474                         | 374,385                    | 374,385                    |

Supplementary Table S2. Comparison of alpha diversity indices within microbiota of soil rhizosphere of clover grown in non-farmed (A) and agricultural soil (B).

| Clover rhizosphere microbiota | Sample | Chao1 | Simpson | Shannon |
|-------------------------------|--------|-------|---------|---------|
| Non-farmed soil               | A1     | 42.2  | 0.892   | 3.242   |
|                               | A2     | 51.8  | 0.898   | 3.302   |
|                               | A3     | 41.2  | 0.890   | 3.222   |
| Agricultural soil             | B1     | 48.6  | 0.896   | 3.282   |
|                               | B2     | 47.6  | 0.894   | 3.262   |
|                               | B3     | 42.2  | 0.892   | 3.242   |

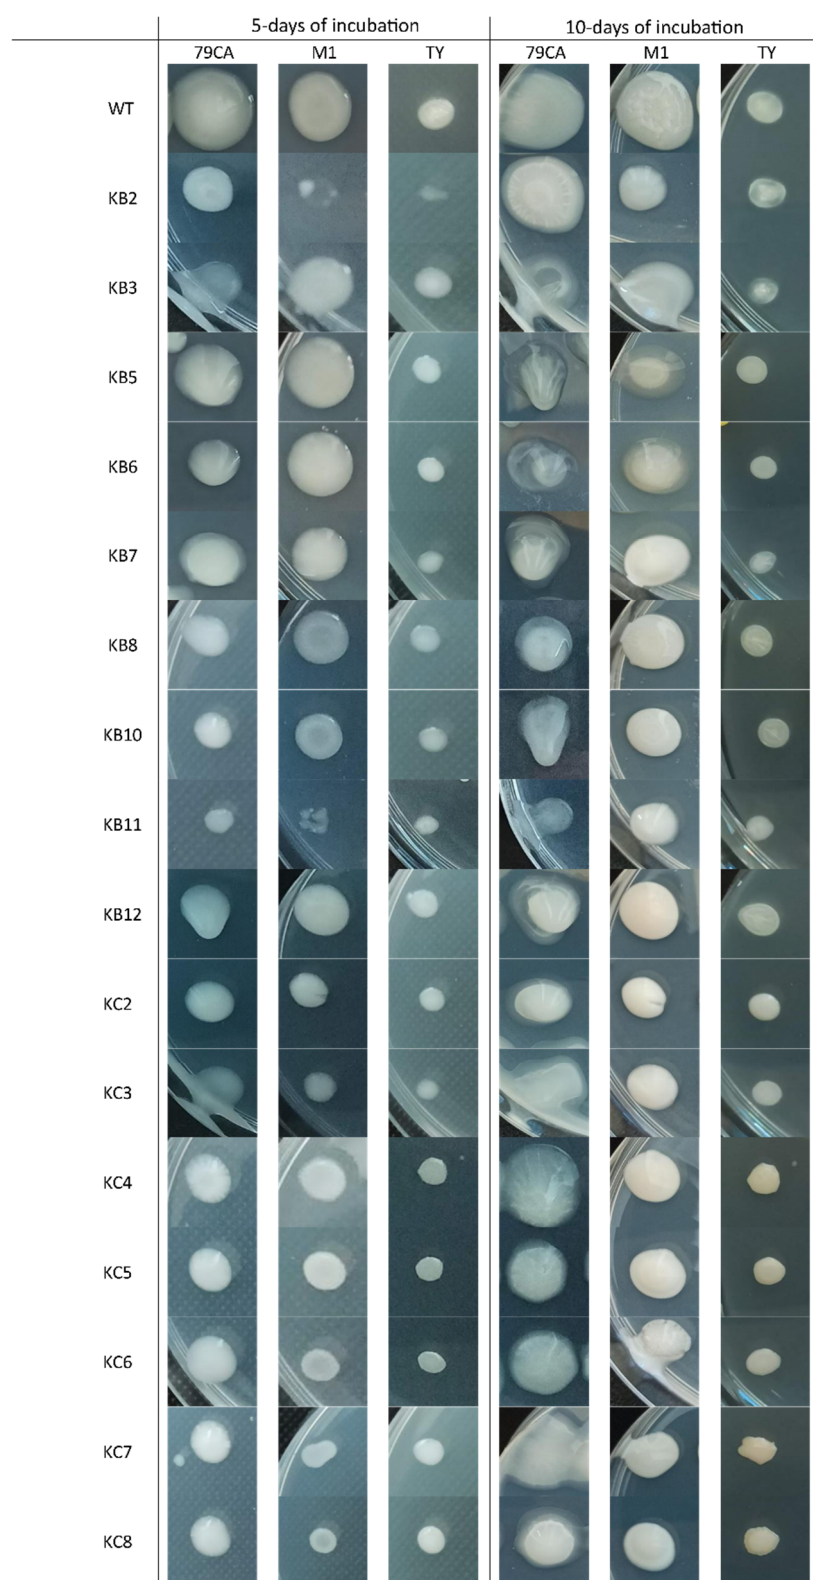

Supplementary Figure S1. Macroscopic characteristics of the nodule isolates derived from white (KB2-12) and red clover (KC2-8) growing in the buffer zone of Białowieża National Park compare with the wild type strain (*Rhizobium leguminosarum* bv. *trifolii* TA1 (marked as WT)). The strains were cultivated in solid 79CA, M1, and TY media. Bacterial suspensions in the bottom panel were washed and standardized to the same starting optical density. Photographs were taken 5 and 10 days post-inoculation (left and right, respectively).

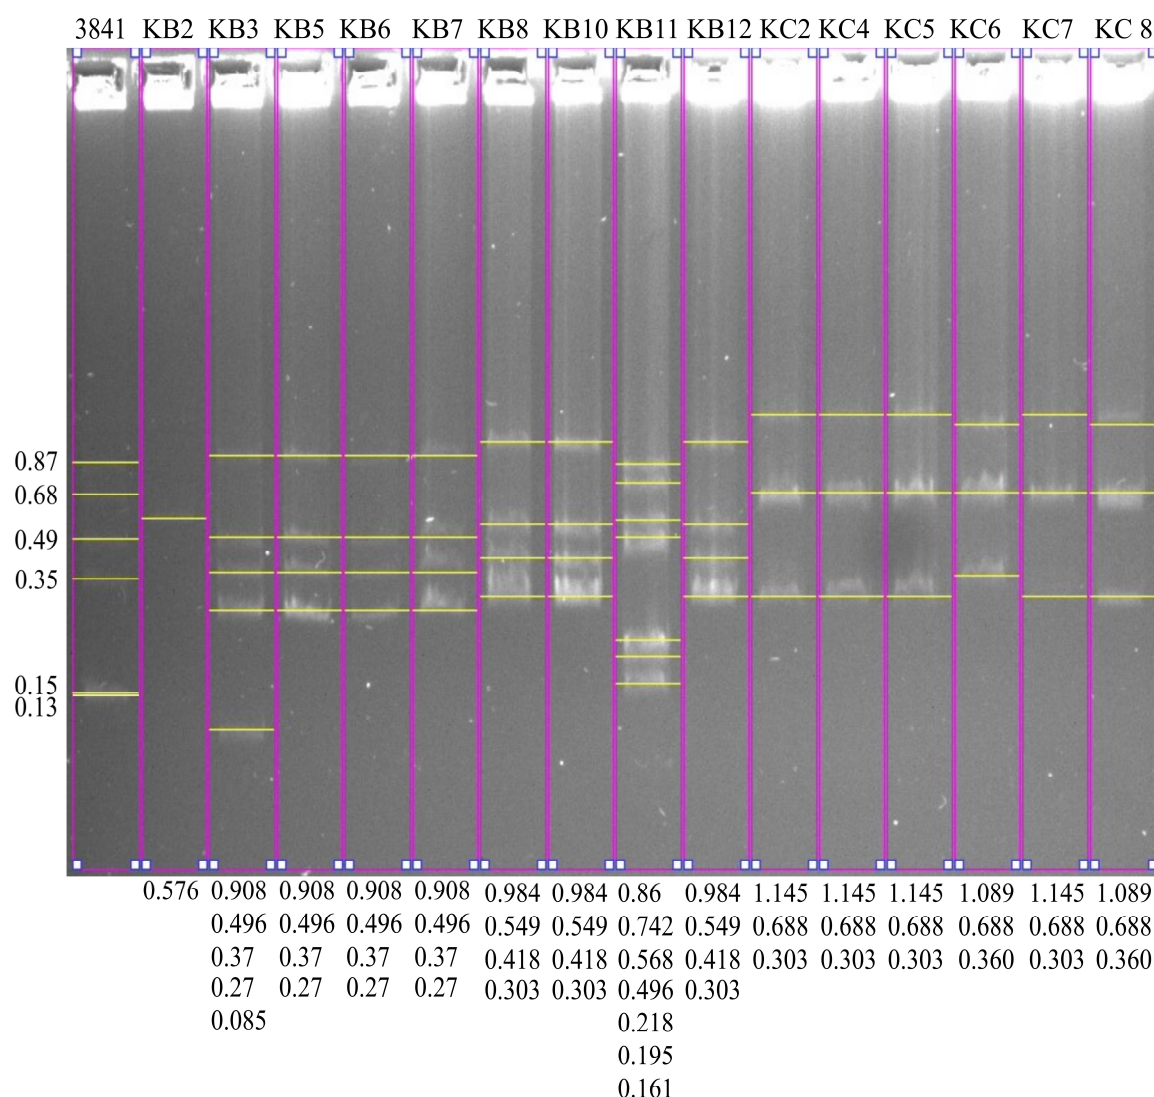

Supplementary Figure S2. Plasmid profiling of *Rhizobium* strains by the Eckhardt method. Lanes: 1: *Rhizobium leguminosarum* bv. *viciae* 3841<sup>T</sup> (T-type strain, ECR size marker); 2-17: *Rhizobium* isolates derived from white (KB2-12) and red clover (KC2-8) growing in the buffer zone of Białowieża National Park. The numbers on the left indicate the size of the replicons (in Mb) of the reference strain, which was the standard for determining the ECR size of the KB and KC strains. The calculated size of KB and KC ECR (in Mb) determined on the basis of electrophoretic mobility relative to the reference strain, arranged from the largest to the smallest, were shown below the lanes.

| <i>Rhizobium leguminosarum</i> K5 |                                   | <i>Rhizobium leguminosarum</i> K4 |  | <i>Rhizobium leguminosarum</i> K87 |  | <i>Rhizobium leguminosarum</i> K88 |  | <i>Rhizobium leguminosarum</i> K812 |  |
|-----------------------------------|-----------------------------------|-----------------------------------|--|------------------------------------|--|------------------------------------|--|-------------------------------------|--|
| Length: 7373243bp, Contigs: 81    |                                   | Length: 7341322bp, Contigs: 86    |  | Length: 7098746bp, Contigs: 101    |  | Length: 7412147bp, Contigs: 103    |  | Length: 7412133bp, Contigs: 103     |  |
| General Info                      |                                   | General Info                      |  | General Info                       |  | General Info                       |  | General Info                        |  |
| Genome ID                         | 384.1015                          | 384.1014                          |  | 379.691                            |  | 379.692                            |  | 384.1013                            |  |
| Genome Name                       | <i>Rhizobium leguminosarum</i> K5 | <i>Rhizobium leguminosarum</i> K4 |  | <i>Rhizobium leguminosarum</i> K87 |  | <i>Rhizobium leguminosarum</i> K88 |  | <i>Rhizobium leguminosarum</i> K812 |  |
| Taxonomy Info                     |                                   |                                   |  |                                    |  |                                    |  |                                     |  |
| Taxon ID                          | 384                               | 384                               |  | 379                                |  | 379                                |  | 384                                 |  |
| Kingdom                           | Bacteria                          | Bacteria                          |  | Bacteria                           |  | Bacteria                           |  | Bacteria                            |  |
| Phylum                            | Proteobacteria                    | Proteobacteria                    |  | Proteobacteria                     |  | Proteobacteria                     |  | Proteobacteria                      |  |
| Class                             | Alphaproteobacteria               | Alphaproteobacteria               |  | Alphaproteobacteria                |  | Alphaproteobacteria                |  | Alphaproteobacteria                 |  |
| Order                             | Hyphomicrobiales                  | Hyphomicrobiales                  |  | Hyphomicrobiales                   |  | Hyphomicrobiales                   |  | Hyphomicrobiales                    |  |
| Family                            | <i>Rhizobiaceae</i>               | <i>Rhizobiaceae</i>               |  | <i>Rhizobiaceae</i>                |  | <i>Rhizobiaceae</i>                |  | <i>Rhizobiaceae</i>                 |  |
| Genus                             | <i>Rhizobium</i>                  | <i>Rhizobium</i>                  |  | <i>Rhizobium</i>                   |  | <i>Rhizobium</i>                   |  | <i>Rhizobium</i>                    |  |
| Species                           | <i>Rhizobium leguminosarum</i>    | <i>Rhizobium leguminosarum</i>    |  | <i>Rhizobium leguminosarum</i>     |  | <i>Rhizobium leguminosarum</i>     |  | <i>Rhizobium leguminosarum</i>      |  |
| Genome Statistics                 |                                   | Genome Statistics                 |  | Genome Statistics                  |  | Genome Statistics                  |  | Genome Statistics                   |  |
| Contigs                           | 81                                | 86                                |  | 101                                |  | 103                                |  | 103                                 |  |
| Genome Length                     | 7373243                           | 7341322                           |  | 7098746                            |  | 7412147                            |  | 7412133                             |  |
| GC Content                        | 60.731064                         | 60.747234                         |  | 60.78547                           |  | 60.722973                          |  | 60.72313                            |  |
| Contig L50                        | 6                                 | 7                                 |  | 11                                 |  | 8                                  |  | 8                                   |  |
| Contig N50                        | 395773                            | 310761                            |  | 221519                             |  | 295871                             |  | 295871                              |  |
| Annotation Statistics             |                                   | Annotation Statistics             |  | Annotation Statistics              |  | Annotation Statistics              |  | Annotation Statistics               |  |
| tRNA                              | 45                                | 45                                |  | 46                                 |  | 47                                 |  | 47                                  |  |
| rRNA                              | 3                                 | 3                                 |  | 3                                  |  | 3                                  |  | 3                                   |  |
| CDS                               | 7515                              | 7478                              |  | 7202                               |  | 7570                               |  | 7567                                |  |
| CDS Ratio                         | 1.019258                          | 1.0186176                         |  | 1.0145454                          |  | 1.0212965                          |  | 1.0208937                           |  |
| Hypothetical CDS                  | 2144                              | 2099                              |  | 1955                               |  | 2102                               |  | 2104                                |  |
| Hypothetical CDS Ratio            | 0.38310048                        | 0.37951323                        |  | 0.37017494                         |  | 0.37701452                         |  | 0.37729615                          |  |
| PFAM CDS                          | 7078                              | 7086                              |  | 6733                               |  | 7004                               |  | 7000                                |  |
| PFAM CDS Ratio                    | 0.94184985                        | 0.94757956                        |  | 0.9348792                          |  | 0.92523116                         |  | 0.9250694                           |  |
| Genome Quality                    |                                   | Genome Quality                    |  | Genome Quality                     |  | Genome Quality                     |  | Genome Quality                      |  |
| Coarse Consistency                | 99.5                              | 99.7                              |  | 99.3                               |  | 99.3                               |  | 99.3                                |  |
| Fine Consistency                  | 95.8                              | 96.3                              |  | 96.3                               |  | 95.4                               |  | 95.4                                |  |
| CheckM Completeness               | 100                               | 100                               |  | 100                                |  | 100                                |  | 100                                 |  |
| Genome Quality                    | Good                              | Good                              |  | Good                               |  | Good                               |  | Good                                |  |

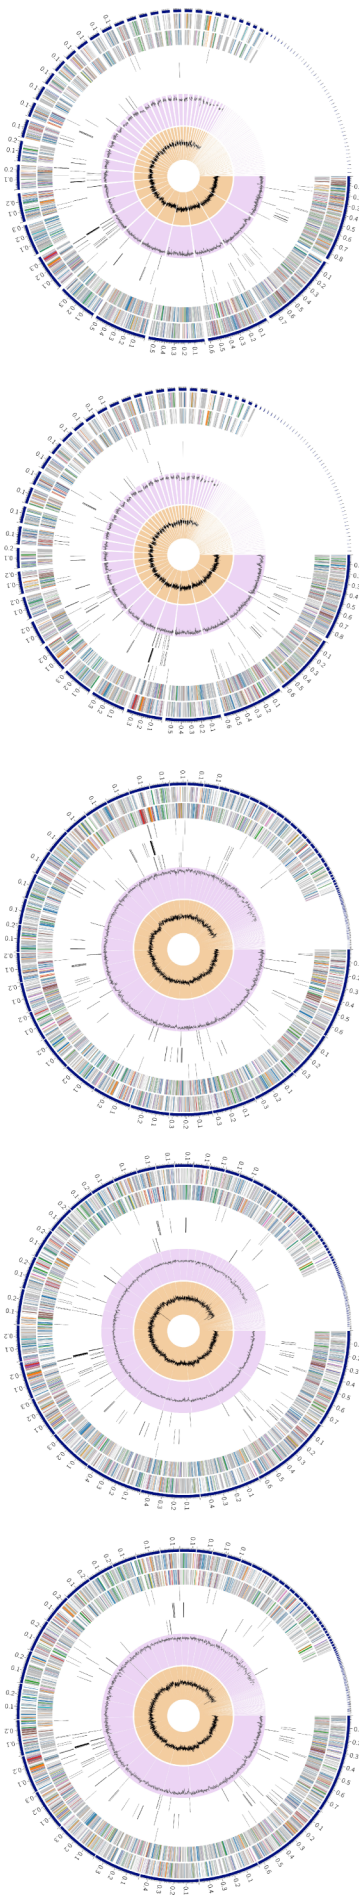

A)

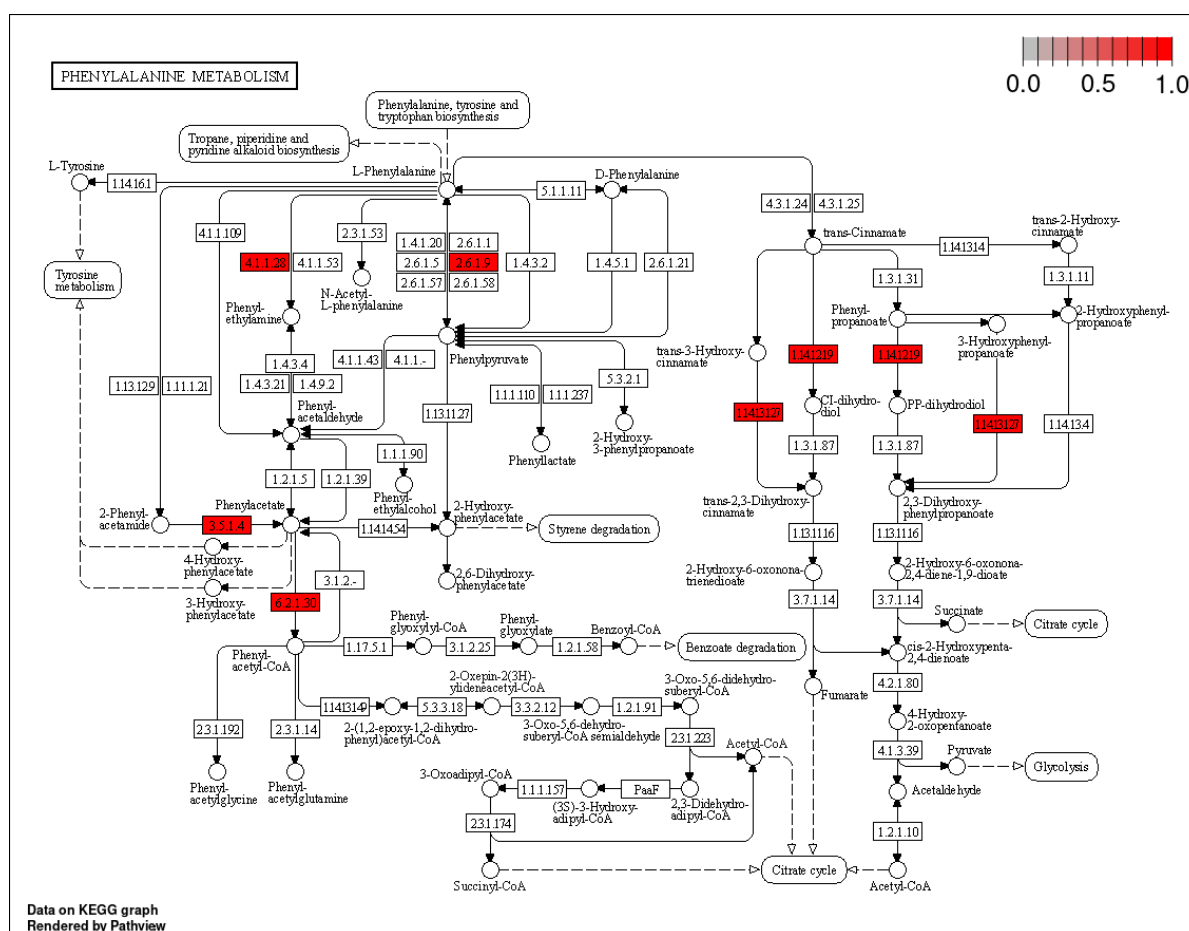



B)

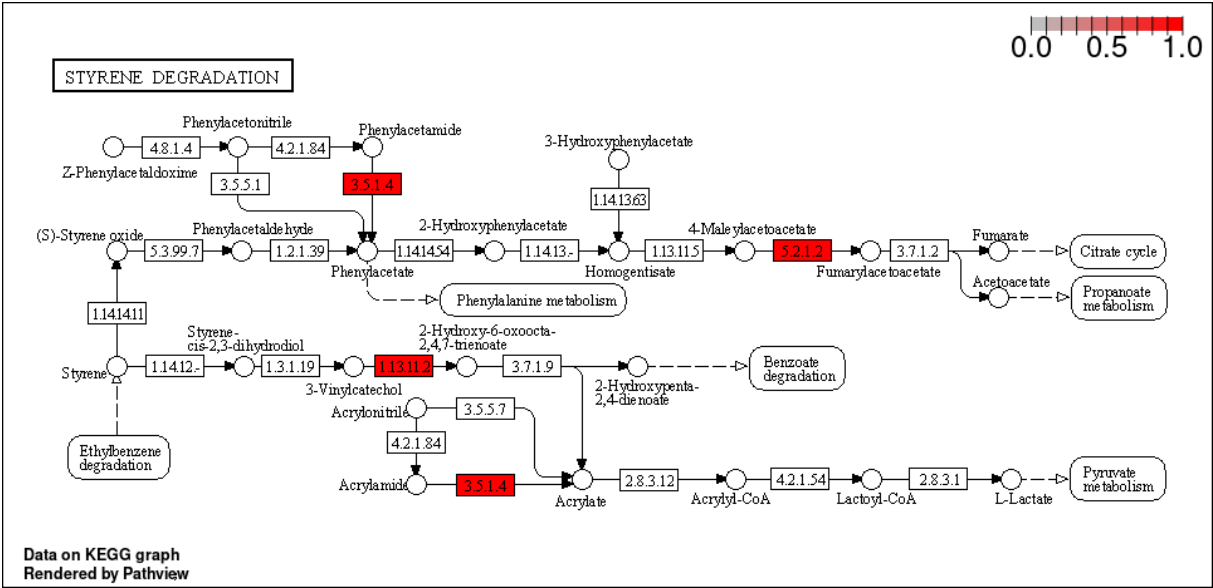



**QUORUM SENSING**

The diagram illustrates the quorum sensing pathways in various bacterial species, categorized by the type of event (Biosynthetic, Activation, Sensing, Signaling) and the specific signaling molecules involved.

**Species and Pathways:**

- Vibrio:** Shows the production of autoinducers (AI-1, AI-2) and their role in regulating virulence factors and biofilm formation.
- Pseudomonas:** Details the LasI/LexA and SdiI/SdiR systems, which regulate the production of proteases, elastase, and other virulence factors.
- Burkholderia:** Illustrates the production of autoinducers (AI-1, AI-2) and their role in regulating virulence factors and biofilm formation.
- Escherichia:** Shows the production of autoinducers (AI-1, AI-2) and their role in regulating virulence factors and biofilm formation.
- Rhodospirillum:** Details the production of autoinducers (AI-1, AI-2) and their role in regulating virulence factors and biofilm formation.
- Klebsiella:** Illustrates the production of autoinducers (AI-1, AI-2) and their role in regulating virulence factors and biofilm formation.
- Agrobacterium:** Shows the production of autoinducers (AI-1, AI-2) and their role in regulating virulence factors and biofilm formation.
- Bacillus:** Details the production of autoinducers (AI-1, AI-2) and their role in regulating virulence factors and biofilm formation.

**Key Signaling Molecules and Pathways:**

- AI-1 (N-acyl homoserine lactone):** Produced by LuxI/LexA, SdiI/SdiR, and other synthase/receptor pairs. It regulates various physiological processes.
- AI-2 (2,2'-diacetylserine):** Produced by LuxS/SymK and other synthase/receptor pairs. It regulates various physiological processes.
- c-di-GMP:** A second messenger involved in biofilm formation and virulence regulation.
- Autoinducers:** Various signaling molecules produced by different bacterial species, including autoinducers, autoinducers, and autoinducers.

**Regulation of Gene Expression:**

- Virulence factors:** Regulated by various signaling molecules, including autoinducers, autoinducers, and autoinducers.
- Biofilm formation:** Regulated by various signaling molecules, including autoinducers, autoinducers, and autoinducers.
- Sporulation:** Regulated by various signaling molecules, including autoinducers, autoinducers, and autoinducers.

Supplementary Figure S4. Mapping the KB unique genes to the KEGG: A) phenylalanine metabolism (00360), B) styrene degradation (00643), C) quorum sensing (02024), pathway maps. Chemical compounds are represented as circles and gene products are represented as rectangles.



[illegible]

Supplementary Figure S5. Mapping the KC unique genes to the KEGG A) benzoate degradation (00362), B) fluorobenzoate degradation (00364), C) quorum sensing (02024) pathway maps. Chemical compounds are represented as circles and gene products are represented as rectangles.
